# Supplementary material for: Post-translational covalent assembly of CAR and synNotch receptors for programmable antigen targeting
Source: PubMed Central journal article supplement (PMC10169838; doi:10.1038/s41467-023-37863-5), 2023-05-09
Supplement: 41467_2023_37863_MOESM1_ESM.pdf [file 41467_2023_37863_MOESM1_ESM.pdf]

*Supplementary Information for:*

**Post-translational covalent assembly of CAR and synNotch  
receptors for programmable antigen targeting**

Elisa Ruffo, Adam A. Butchy, Yaniv Tivon, Victor So, Michael Kvorjak, Avani Parikh, Eric L. Adams, Natasa Miskov-Zivanov, Olivera J. Finn, Alexander Deiters, and Jason Lohmueller

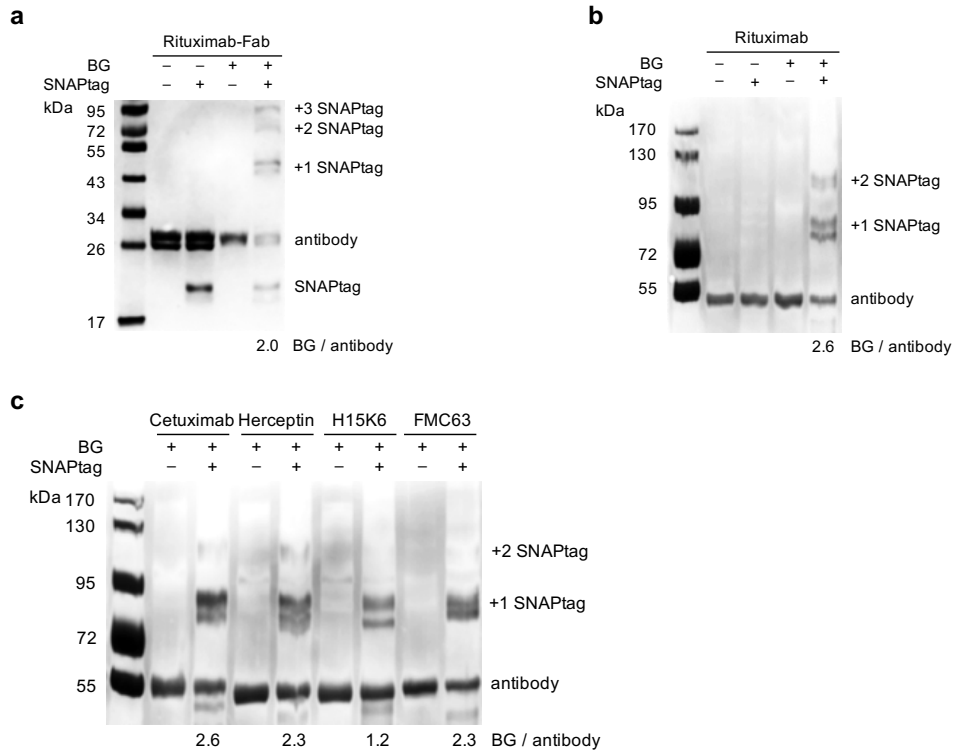

**Figure S1 | SDS-PAGE quantification of antibody-conjugated benzyl guanines by SNAP conjugation reaction.** Quantification of antibody benzylguanine (BG) labeling efficiency. SNAPtag conjugation to the light chain, **a**, or the whole antibody, **b**, was only achieved in the presence of both the BG-labeled antibody and the SNAPtag protein. A panel of BG-labeled antibodies, **c**, were then assessed in the same manner. Average number of BGs per antibody was calculated based on relative band intensities. The SDS-PAGE quantification gels are representative of a single experiment. Source data are available as a Source Data file.

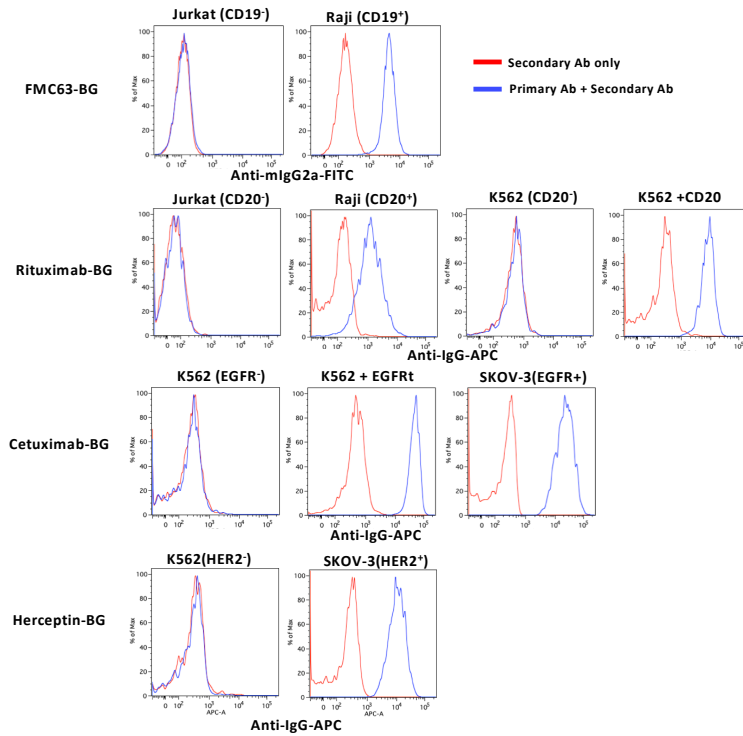

**Figure S2 | Staining of target cell lines by BG-conjugated antibodies.** Target cell lines were stained with 1.6  $\mu\text{g}/\text{mL}$  of the indicated BG-conjugated antibodies (1.0  $\mu\text{g}/\text{mL}$  was used for FMC63-BG) followed by staining with an anti-IgG secondary antibody (anti-mIgG2a-FITC for FMC63-BG and anti-IgG (Fab2)-APC for all other antibodies). Cells were then washed and analyzed by flow cytometry. Source data are available as a Source Data file.

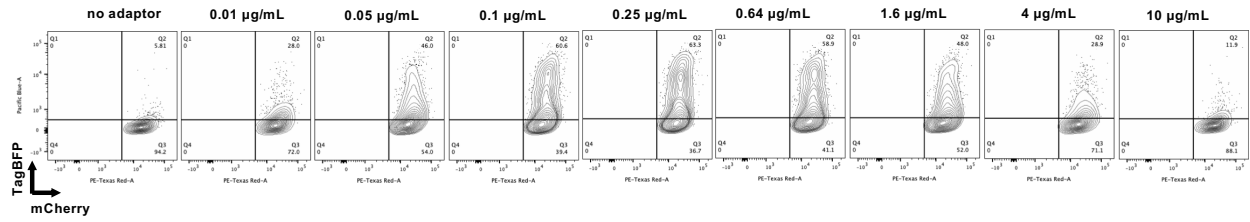

**Figure S3 | Contour plots of FMC63-BG adaptor induction of TagBFP output by SNAP-synNotch cells.** SNAP-synNotch cells were co-incubated with Raji cells and the indicated concentration of FMC63-BG adaptor for 48 hours. Cells were analyzed by flow cytometry and gated for mCherry expression. TagBFP output gene expression is plotted vs. mCherry (5% contour with outliers). Images correspond to a single replicate from the first panel of **Fig. 2d**. Source data are available as a Source Data file.

| Raji Cells (Millions) | SNAP-synNotch Cells (Millions) |     |     |      |                    |      |      |      |                    |      |      |      | Color key (MFI) |
|-----------------------|--------------------------------|-----|-----|------|--------------------|------|------|------|--------------------|------|------|------|-----------------|
|                       | 0.5                            |     |     |      | 0.1                |      |      |      | 0.01               |      |      |      |                 |
|                       | 1                              | 0.5 | 0.1 | 0.01 | 1                  | 0.5  | 0.1  | 0.01 | 1                  | 0.5  | 0.1  | 0.01 |                 |
|                       | 0 µg/mL FMC63-BG               |     |     |      | 0.1 µg/mL FMC63-BG |      |      |      | 1.0 µg/mL FMC63-BG |      |      |      |                 |
| 1                     | 431                            | 463 | 551 | 541  | 748                | 955  | 1176 | 1518 | 1970               | 2877 | 4219 | 4434 |                 |
| 0.5                   | 485                            | 525 | 557 | 505  | 979                | 1125 | 1939 | 1809 | 1813               | 2683 | 4567 | 5349 |                 |
| 0.1                   | 447                            | 483 | 470 | 341  | 1158               | 1568 | 2537 | 3397 | 1218               | 1488 | 2264 | 2468 |                 |
| 0.01                  | 445                            | 522 | 511 | 286  | 550                | 732  | 1016 | 1823 | 519                | 667  | 984  | 806  |                 |

**Figure S4 | Effector to target effect on SNAP-synNotch receptor activity.** Flow cytometry analysis of the activation of SNAP-synNotch cells co-incubated with the indicated target cell lines and FMC63-BG antibody at the indicated cell numbers and antibody concentrations for 48 hours for TagBFP output gene expression reported as mean fluorescence intensity (MFI). Source data are available as a Source Data file.

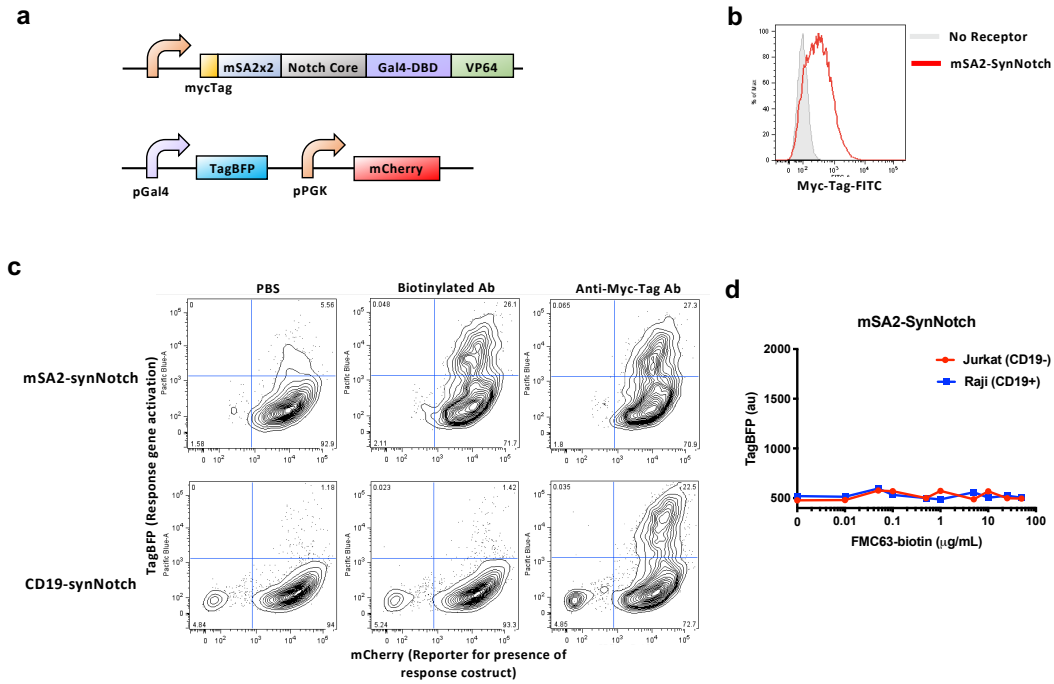

**Figure S5 | mSA2 biotin-binding synNotch receptor is activated by plate-bound biotinylated antibody but not antibody bound to the surface of target cells. a**, Design of SNAP-synNotch receptor expression and response lentiviral vectors. **b**, Flow cytometry analysis of the surface expression of the mSA2-synNotch receptor on transduced vs. MOCK (un)transduced Jurkat cells assessed by staining with the anti-Myc-Tag antibody. **c**, Flow cytometry analysis of the activation of mSA2-synNotch cells incubated on plates coated with PBS, biotinylated antibody, or anti-Myc-Tag antibody, for 48 hours for TagBFP output gene expression of response construct positive (mCherry+) cells. **d**, Flow cytometry analysis of the activation of mSA2-synNotch cells co-incubated with the indicated target cell lines and antibody concentrations for 48 hours for TagBFP output gene expression of response construct positive (mCherry+) cells reported as mean fluorescence intensity (MFI). Source data are available as a Source Data file.

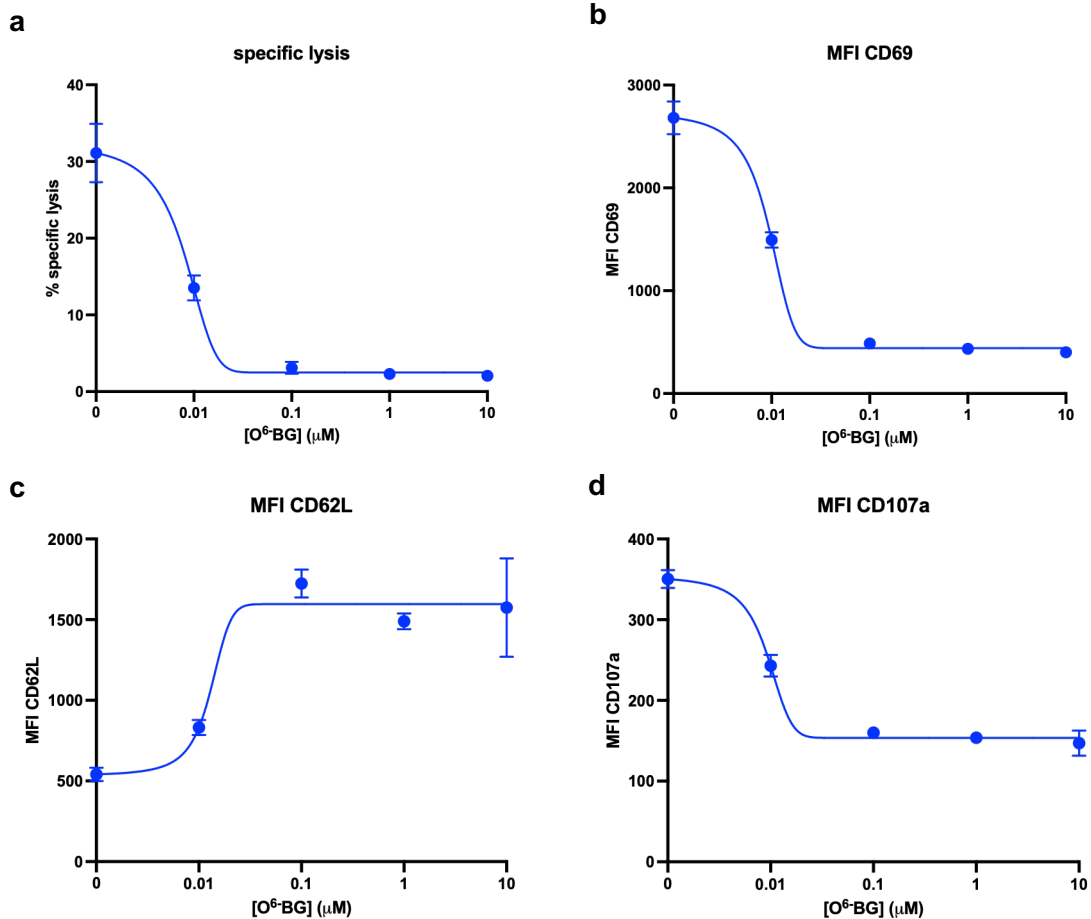

**Figure S6 | O6-BG inhibits SNAP-CAR activity.** **a**, Specific lysis of K562+HER2 cell line by co-incubating primary human SNAP-CAR T cells and 1 μg/mL of Herceptin-BG antibody and indicated levels of O6-BG for 24 hours. **b**, **c**, **d** flow cytometry analysis of CD69, CD62L, and CD107a T cell activation markers on the SNAP-CAR T cells (LNGFR+ cell population) from co-incubation in **a**, reported as MFI, +/- std. deviation, n=3. Curve fits were performed in GraphPad Prism using non-linear regression “LogAbsoluteIC50” with base-line and top value constraints set by experimental values. Source data are available as a Source Data file.

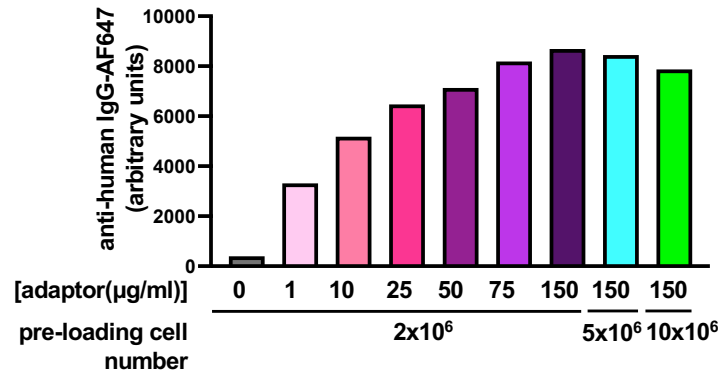

**Figure S7 | Tuning SNAP-CAR T cell labeling by adaptor dose.** Flow cytometry analysis of the indicated number of primary human SNAP-CAR CAR T cells co-incubated with varying doses of Rituximab-BG adaptor for 1 hour at 37°C, stained with a fluorescently labeled anti-human IgG-AF647 secondary antibody. Source data are available as a Source Data file.



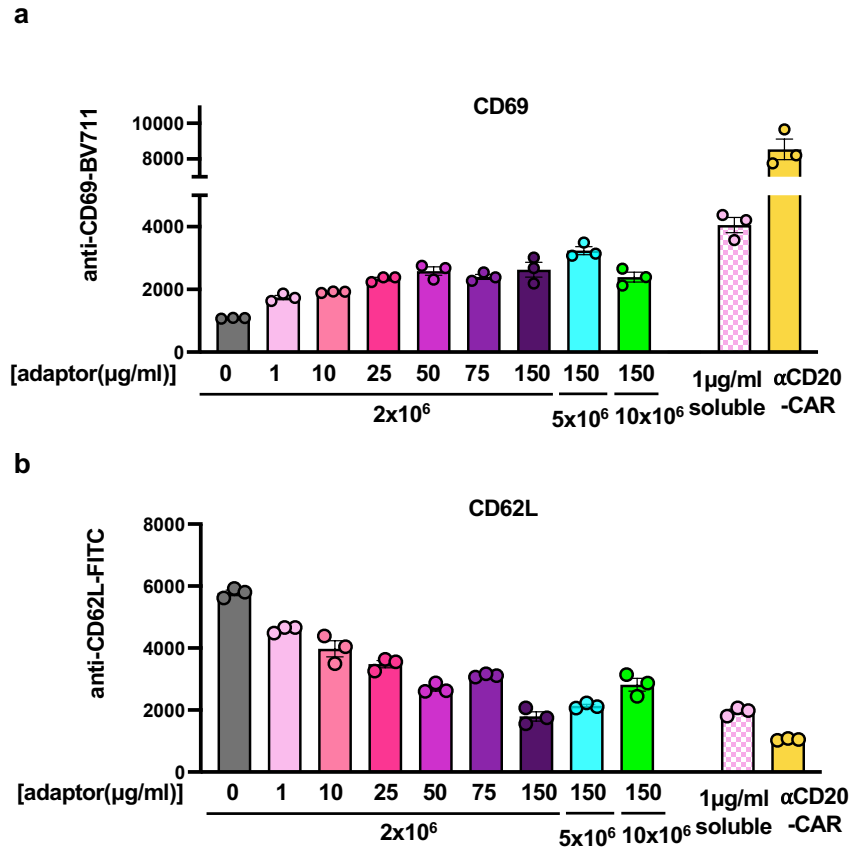

**Figure S8 | Tuning T cell activation by adaptor dose.** Flow cytometry analysis of primary human SNAP-CAR T cells at the indicated cell concentrations co-incubated with the indicated Rituximab-BG adaptor doses for 1 hour at 37°C, followed by co-incubation with NALM6+CD20 target cells for 24 hours and staining for **a**, CD69, and **b**, CD62L markers on the SNAP-CAR T cells (LNGFR+ cell population), reported as MFI. n = 3 biologically-independent experiments ± s.e.m. Source data are available as a Source Data file.

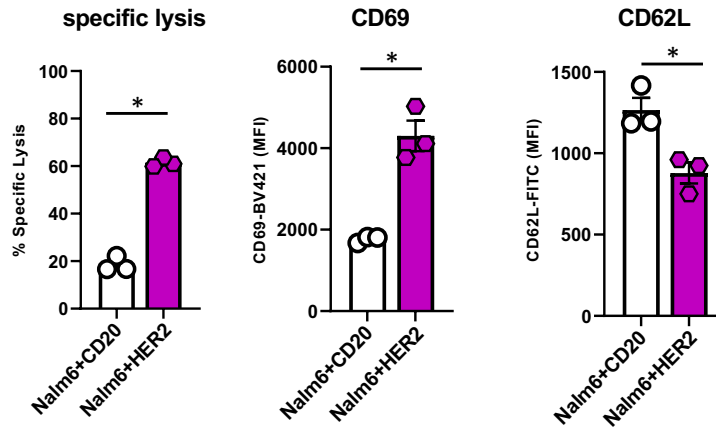

**Figure S9 | Anti-HER2 CAR T cells show HER2-targeted effector function *in vitro*.** Flow cytometry analysis of primary human anti-HER2 CAR T cells co-incubated with the indicated cell HER2+ or HER2(-) cell lines for 24 hours, for specific lysis of target cell lines and activation markers CD69, and CD62L markers on the SNAP-CAR T cell (LNGFR+ cell population), reported as MFI. n = 3 biologically-independent experiments  $\pm$  s.e.m. To test significance, unpaired two-tailed student's t-tests were performed and “\*” denotes a significance of  $p < 0.05$ . Exact p-values are  $p < 0.0001$  for specific lysis,  $p = 0.0025$  for CD69, and  $p = 0.0178$  for CD62L. Source data are available as a Source Data file.

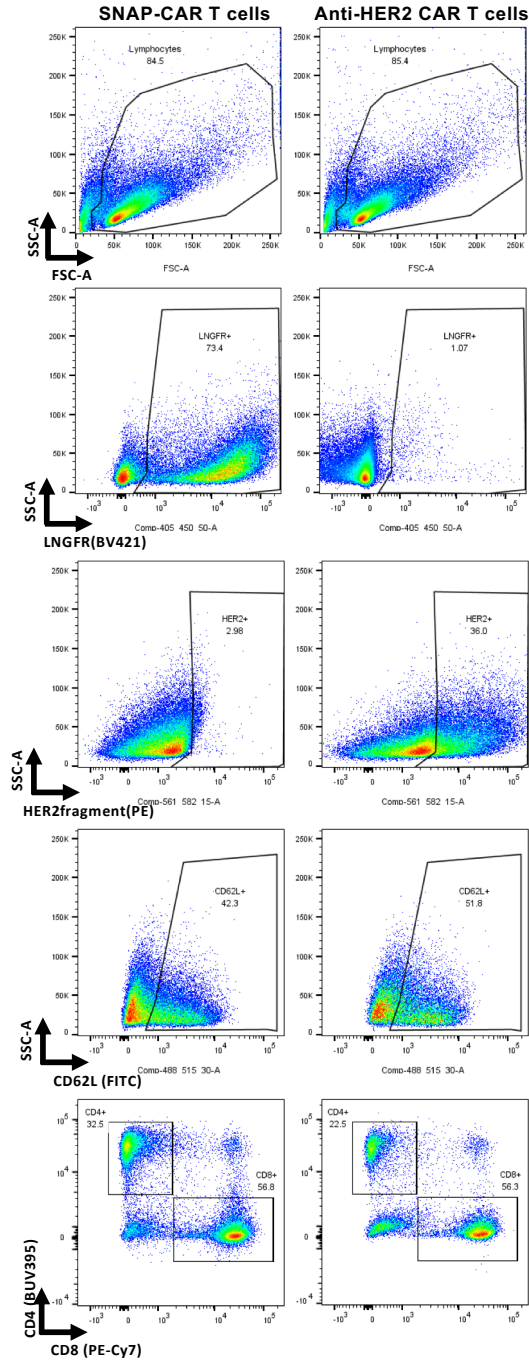

**Figure S10 | CAR expression and T cell subset analysis of primary human CAR T cells.** At day 5 post viral transduction (6 days prior to mouse injection), primary human CAR T cells were stained with the indicated antibodies and recombinant HER2-PE protein, washed, and analyzed by flow cytometry. Source data are available as a Source Data file.

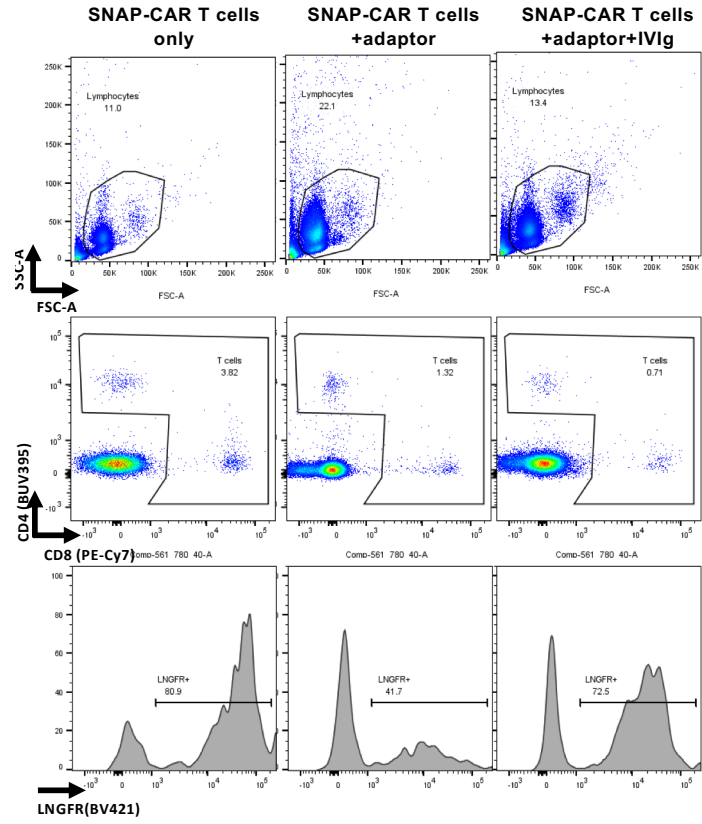

**Figure S11 | IVIG co-injection maintains adoptively transferred SNAP-CAR T cells in the blood of mice.** NSG mice were injected with SNAP-CAR T cells with or without Herceptin-BG antibody adaptor and IVIG. Following 24 hours mice underwent submandibular bleeding, RBC lysis, and washing. Isolated cells were stained with the anti-CD4, anti-CD8, and anti-LNGFR antibodies and analyzed via flow cytometry. Source data are available as a Source Data file.

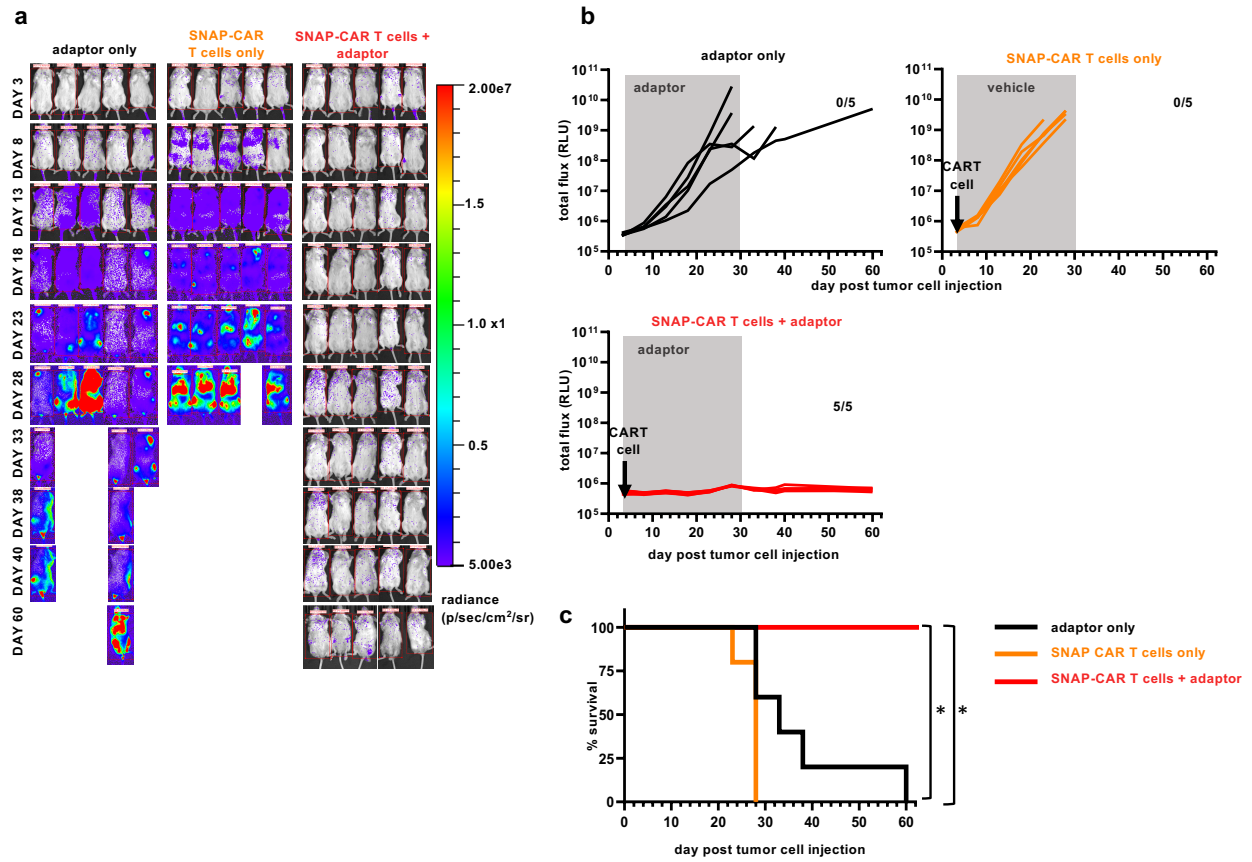

**Figure S12 | Anti-tumor activity of SNAP-CAR T cells *in vivo* in a human tumor xenograft mouse model.** **a**, IVIS imaging of tumor burden over time. **b**, Quantification of tumor growth via luciferase intensity (relative light units, RLU) for mouse images in **a**. The number in the right side of the plot indicates the total number of mice that are tumor-free at day 60. **c**, Survival of treated mice over time. For **c**, a Mantel-Cox log-rank test was performed with a Bonferroni correction for multiple comparisons and “\*” denotes a significance of  $p < 0.025$  for 2 comparisons,  $n = 5$  mice. Exact p-values are  $p=0.0017$  for adaptor-only and  $p = 0.0035$  for SNAP CAR T cells only. Source data are available as a Source Data file.

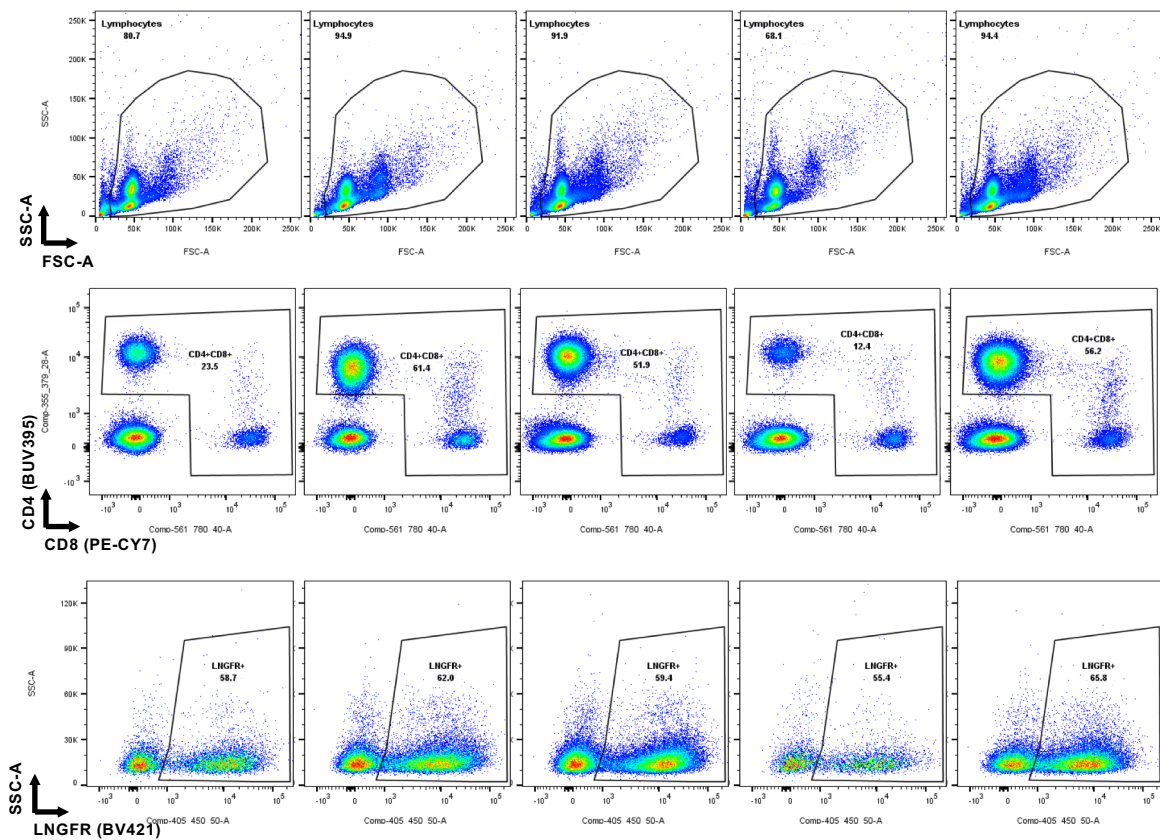

**Figure S13 | Persistence of SNAP-CAR T cells *in vivo* in the blood of mice.** Day 35 post tumor cell challenge, mice in the group treated with SNAP-CAR T cells + adaptor in Supplementary Fig. S12, underwent submandibular bleeding, RBC lysis, and washing. Isolated cells were stained with anti-CD4, anti-CD8, and anti-LNGFR antibodies and total human T cells (identified by CD4+ or CD8+) were analyzed via flow cytometry for % LNGFR-PE positive (CAR positivity). Each column corresponds to a single mouse. Source data are available as a Source Data file.

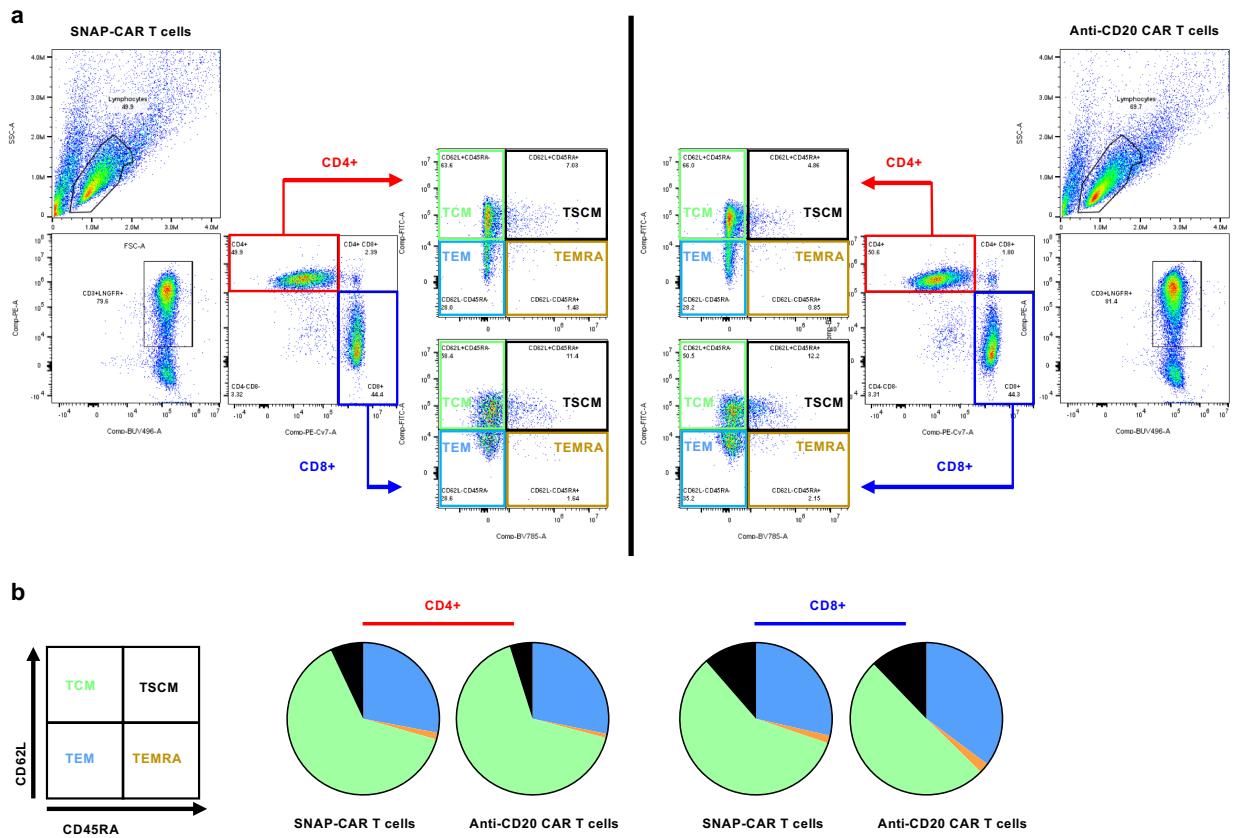

**Figure S14 | T cell memory subsets of SNAP-CAR T cells compared to a traditional anti-CD20 CAR T cells.** **a**, SNAP-CAR T cell and anti-CD20 CAR T cell phenotypes at day 7 post isolation. SNAP-CAR T cells and anti-CD20 CAR T cells were stained with anti-CD3, anti-CD4, anti-CD8, anti-LNGFR, anti-CD62L and anti-CD45RA antibodies and analyzed via flow cytometry. **b**, Gating scheme to identify putative T cell memory subsets, and pie charts for each cell population based on flow cytometry data in **a**. Source data are available as a Source Data file.

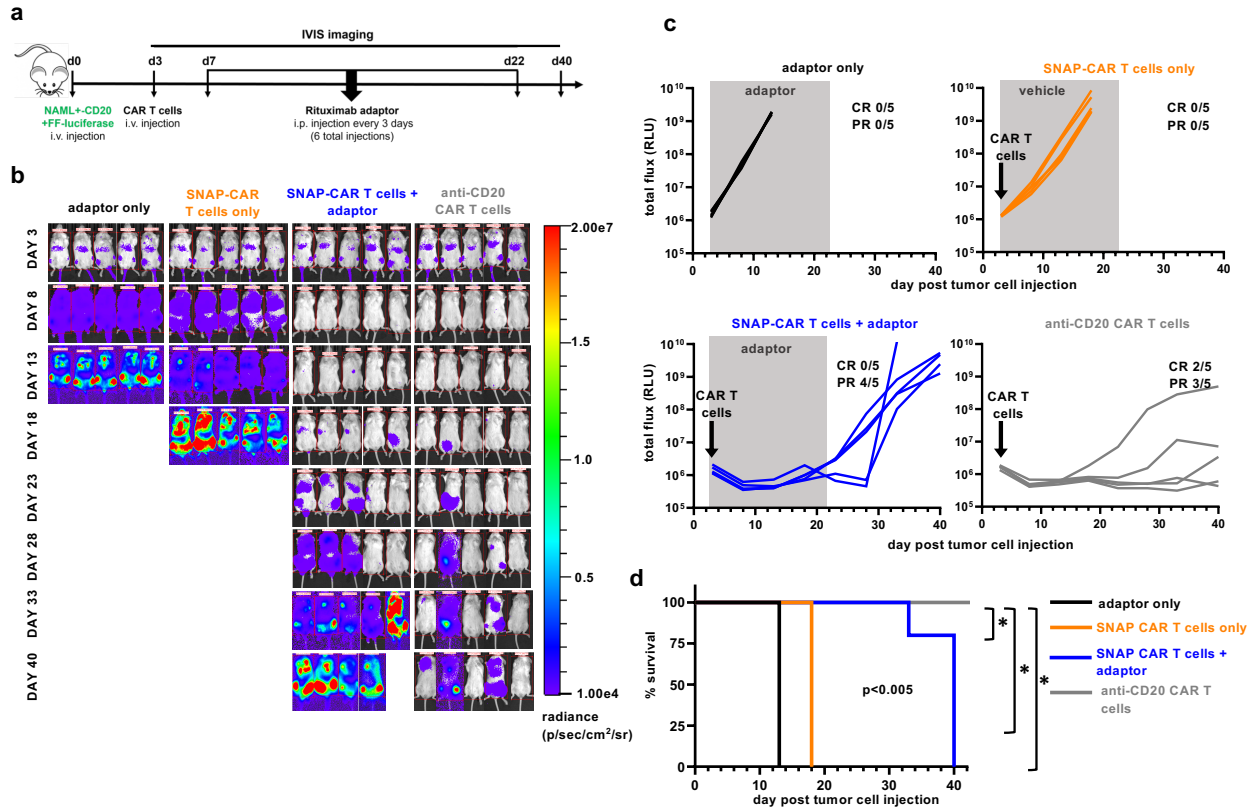

**Figure S15 | Anti-tumor activity of SNAP-CAR T cells targeting CD20 *in vivo* in a human tumor xenograft mouse model.** **a**, timeline and experimental design and **b**, IVIS imaging of tumor burden. **c**, Quantification of tumor growth via luciferase intensity (relative light units, RLU) for mouse images in **a**. PR” indicates partial response which is defined by a final tumor size over baseline but  $<10^9$  at day 33. **d**, Survival of treated mice over time. **d**, a Mantel-Cox log-rank test was performed with a Bonferroni correction for multiple comparisons and “ \* ” denotes a significance of  $p < .01667$  for 3 comparisons,  $n = 5$  mice per group. Exact p-values are  $p=0.0027$  for adaptor-only,  $p = 0.0027$  for SNAP CAR T cells only, and  $p = 0.0035$  for anti-CD20 CAR T cells. Source data are available as a Source Data file.



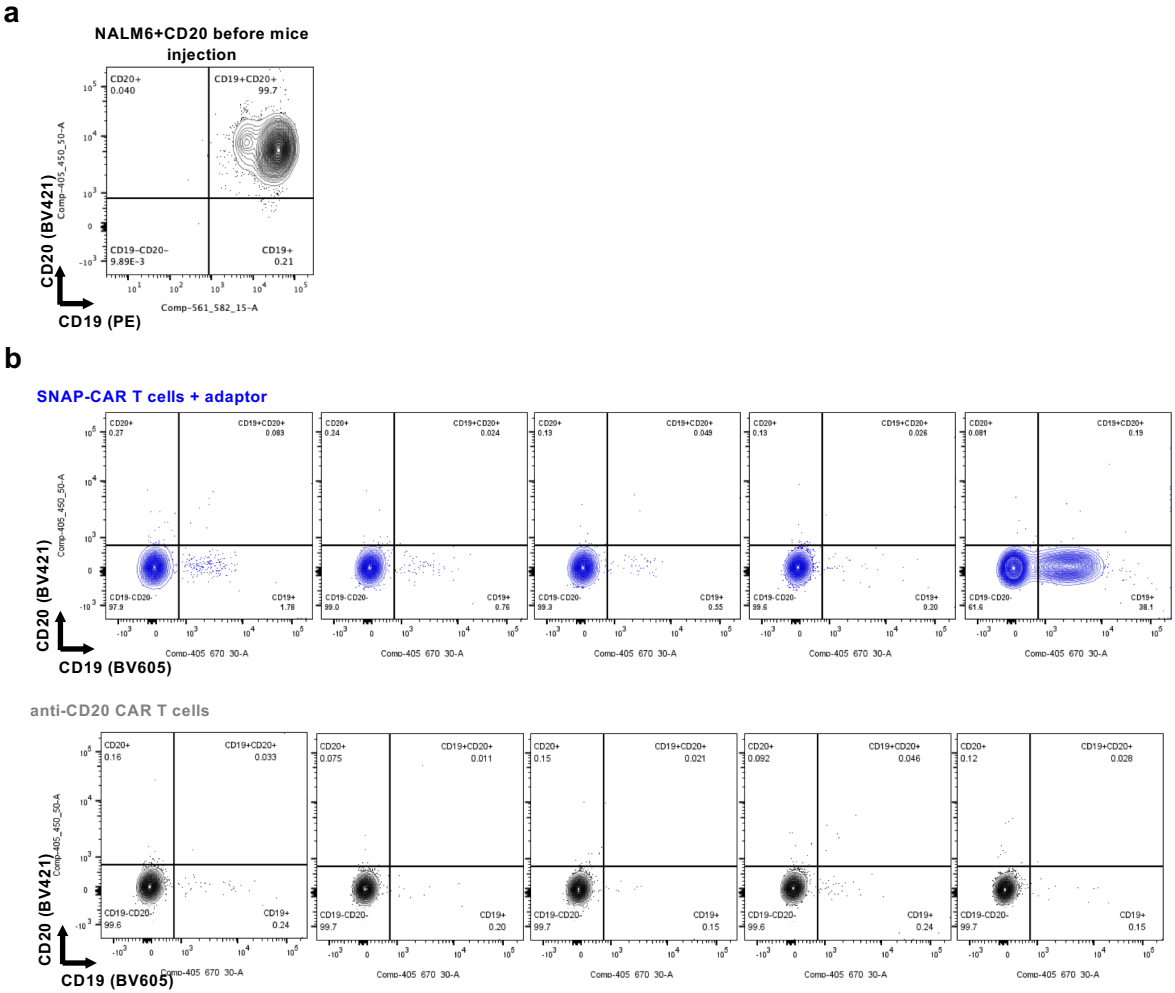

**Figure S16 | Outgrowth of CD20(-) tumor cells in the blood of mice.** **a**, Staining and flow cytometry analysis of NALM6+CD20 cells for CD19 and CD20 markers performed 1 day prior to their injection into mice. **b**, On day 40 post tumor cell injection, cells were harvested from the blood of mice from the indicated treatment groups. Isolated cells were then stained with the anti-CD19 and anti-CD20 antibodies and analyzed via flow cytometry. In **b**, each plot corresponds to a single mouse. Source data are available as a Source Data file.

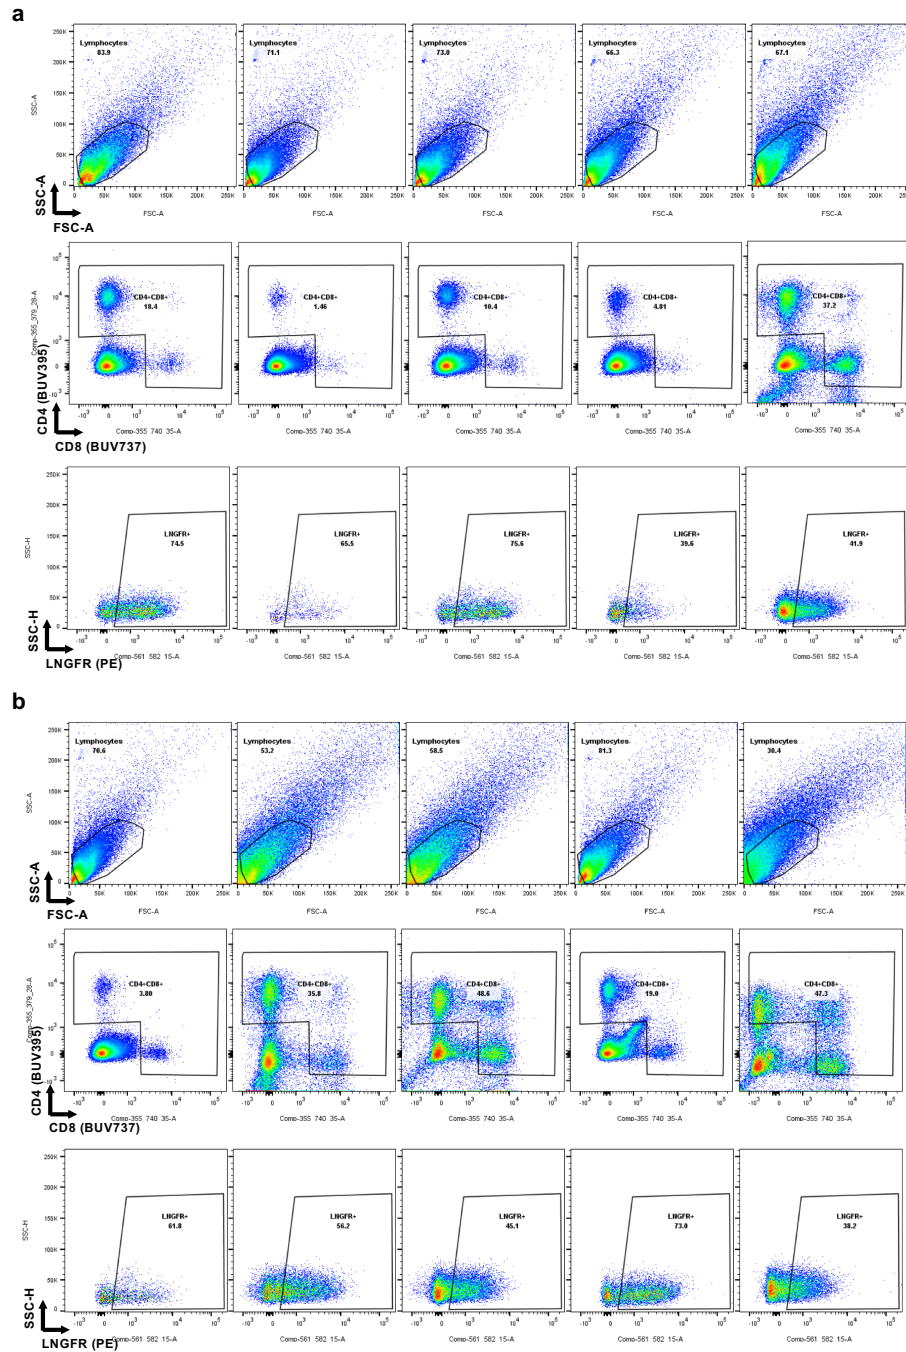

**Figure S17 | Persistency of SNAP-CAR T cells *in vivo*.** Day 40 post tumor cell challenge, splenocytes were harvested from groups of mice in Supplementary Fig. S15 treated with **a**, SNAP-CAR T cells + adaptor and **b**, CD20-CAR T cells. Isolated cells were stained with the anti-CD4, anti-CD8, and anti-LNGFR antibodies. Total human T cells (identified by CD4+ or CD8+) were

analyzed via flow cytometry for % LNGFR-PE positive (CAR positivity). Each column corresponds to a single mouse. Source data are available as a Source Data file.

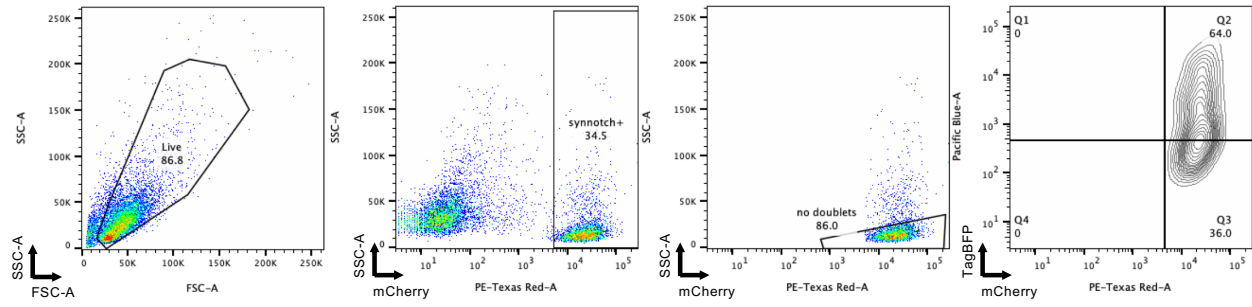

**Figure S18 | Representative gating scheme for synNotch/target cell co-incubation assays.**

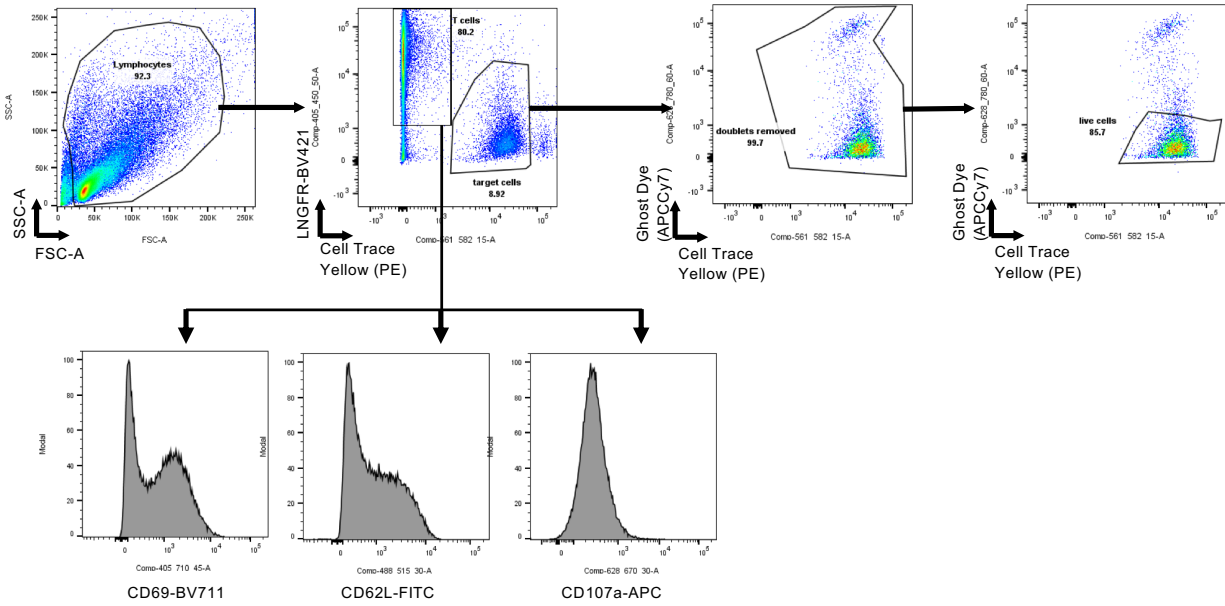

**Figure S19 | Representative gating scheme for CAR T cell/target cell co-incubation assays.**

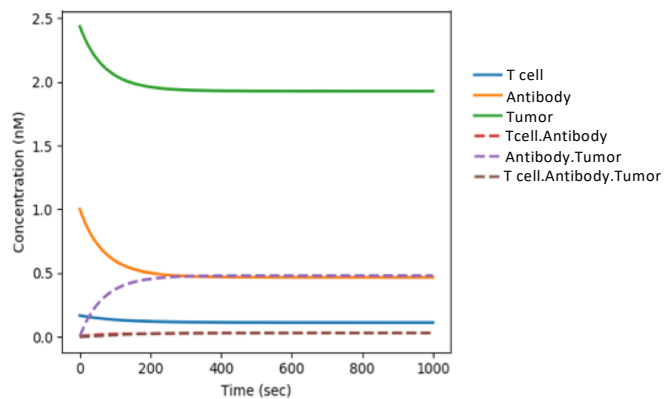

**Figure S20 | Representative kinetic simulation.** A kinetic simulation was performed using the experimental and literature values for the Cetuximab antibody and the EGFR antigen. All solid lines represent the species that are provided to the model while those in dotted lines represent complex species. Source data are available as a Source Data file.

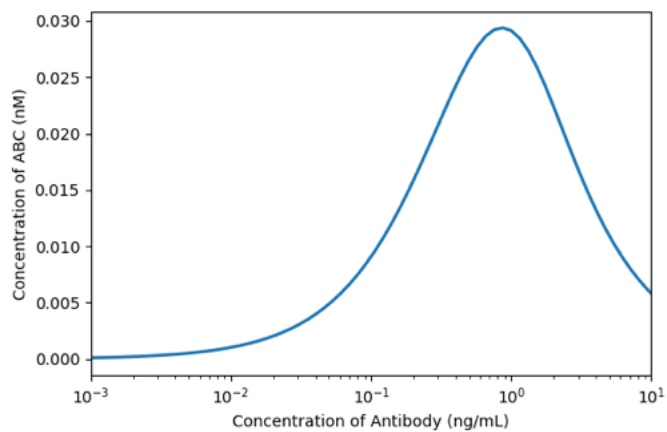

**Figure S21 | Representative equilibrium simulation.** An equilibrium simulation was performed using the experimental and literature values for the Cetuximab antibody and the EGFR antigen. “ABC” denotes the ternary body formation. Source data are available as a Source Data file.

**Table S1 | Quantification of the number of BG molecules conjugated per antibody.** Data summary from *Fig. S2*. Source data are available as a Source Data file.

| Antibody      | Antigen | # of BG/Antibody |
|---------------|---------|------------------|
| Rituximab     | CD20    | 2.8              |
| FMC63         | CD19    | 2                |
| Cetuximab     | EGFR    | 2.6              |
| Herceptin     | HER2    | 2.3              |
| Rituximab-Fab | CD20    | 2.5              |



**Table S2 | Model parameters used in simulations.** Indicated parameters and their starting values as derived from the experimental set-up or from the literature. Source data are available as a Source Data file.

| <i>Experimental Setup</i>                         |                     |                                             |                            |                        |                 |
|---------------------------------------------------|---------------------|---------------------------------------------|----------------------------|------------------------|-----------------|
| <i>Description</i>                                | <i>Value</i>        | <i>Units</i>                                |                            |                        |                 |
| Well Volume                                       | 150                 | uL                                          |                            |                        |                 |
| Number of T Cells                                 | 150,000             | cells                                       |                            |                        |                 |
| Number of Tumor Cells                             | 400,000             | cells                                       |                            |                        |                 |
| $k_f$ for BG-site covalent bonding (Gautier 2008) | 2.80 e-05           | nM <sup>-1</sup> · sec <sup>-1</sup>        |                            |                        |                 |
| <i>Antigen Parameters</i>                         |                     |                                             |                            |                        |                 |
| <i>Antigen</i>                                    | <i>Range</i>        |                                             |                            |                        |                 |
| CD19                                              | 10,000 – 500,000    |                                             |                            |                        |                 |
| CD20                                              | 100,000 – 300,000   |                                             |                            |                        |                 |
| EGFR                                              | 100,000 – 1,000,000 |                                             |                            |                        |                 |
| HER2                                              | 150,000 – 1,000,000 |                                             |                            |                        |                 |
| <i>Kinetic Parameters</i>                         |                     |                                             |                            |                        |                 |
| <i>Antibody</i>                                   | <i>Antigen</i>      | $k_f$ (nM <sup>-1</sup> sec <sup>-1</sup> ) | $k_r$ (sec <sup>-1</sup> ) | $K_{equilibrium}$ (nM) | <i>Citation</i> |
| Cetuximab                                         | EGFR                | 3.10 e-03                                   | 5.80 e-03                  | 1.87 e-00              | Talavera 2009   |
| FMC63                                             | CD19                | 6.24 e-04                                   | 5.50 e-04                  | 8.81 e-01              | Kramer 2017     |
| Herceptin                                         | HER2                | 5.70 e-05                                   | 1.20 e-06                  | 2.11 e-01              | Bondza 2017     |
| Rituximab                                         | CD20                | 5.56 e-04                                   | 1.11 e-04                  | 2.00 e-01              | Melhus 2007     |

**Table S3 | Model simulation error.** Summary of sum of squared error (SSE) values calculated between the experimental results and simulations for simulations using parameters from the literature or parameters derived from model fitting. Source data are available as a Source Data file.

| <i>Model Error</i>      |                              |                          |
|-------------------------|------------------------------|--------------------------|
| <i>Simulation</i>       | <i>Literature Simulation</i> | <i>Fitted Simulation</i> |
| CAR with Cetuximab      | 0.38                         | 0.38                     |
| CAR with FMC63          | 0.61                         | 0.01                     |
| CAR with Herceptin      | 0.08                         | 0.02                     |
| CAR with Rituximab      | 2.36                         | 0.21                     |
| synNotch with Cetuximab | 0.73                         | 0.02                     |
| synNotch with FMC63     | 0.20                         | 0.03                     |
| synNotch with Herceptin | 1.39                         | 0.02                     |
| synNotch with Rituximab | 2.51                         | 0.02                     |

Table S4 | DNA sequences of gene constructs.

|                                                                                                                                                                                                                                                                                                                                                                                                                                                                                                                                                                                                                                                                                                                                                                                                                                                                                                                                                                                                                                                                                                                                                                                                                                                                                                                                                                                                                                                                                                                                                                                                                                                                                                                                                                                                                                                                                                                                                                                                                                                                                                                                                                                                                                                                                                                                                                                                                                                                                                                                                                                  |
|----------------------------------------------------------------------------------------------------------------------------------------------------------------------------------------------------------------------------------------------------------------------------------------------------------------------------------------------------------------------------------------------------------------------------------------------------------------------------------------------------------------------------------------------------------------------------------------------------------------------------------------------------------------------------------------------------------------------------------------------------------------------------------------------------------------------------------------------------------------------------------------------------------------------------------------------------------------------------------------------------------------------------------------------------------------------------------------------------------------------------------------------------------------------------------------------------------------------------------------------------------------------------------------------------------------------------------------------------------------------------------------------------------------------------------------------------------------------------------------------------------------------------------------------------------------------------------------------------------------------------------------------------------------------------------------------------------------------------------------------------------------------------------------------------------------------------------------------------------------------------------------------------------------------------------------------------------------------------------------------------------------------------------------------------------------------------------------------------------------------------------------------------------------------------------------------------------------------------------------------------------------------------------------------------------------------------------------------------------------------------------------------------------------------------------------------------------------------------------------------------------------------------------------------------------------------------------|
| <p><b>SNAP-41BB<math>\zeta</math>-T2A-TagBFP (entire coding region inserted into pHR-PGK vector)</b></p> <p><b>GGAGCAAGGCAGGTGGACAGTGGATC</b>atggagacagacacactctgctatgggtgctgctgctggttccaggttccacaggtATGGACAAAGATTGCGAGATGAAGAGAACCACCCTGGATAGCCCTCTCGGCAAGCTCGAACTTTCTGGTTGTGAACAGGGTTTGCACAGGATCATCTTCTGGGAAAGGGAACCTCAGCCGCAGATGCGGTTGAAGTGCCAGCTCCGGCTGCAGTGCTTGGTGGACCCGAGCCTCTTATGCAAGCAACGGCATGGCTTAATGCTTATTTTACCAGCCTGAGGCCATTGAAGAGTTTCCAGTTCTTGCATGTCATCACCCCGTTTTTTCAGCAGGAATCCTTCACTAGACAAGTGCTTTGGAAAGCTCTTGAAAGTGGTTAAATTTGGGGAAGTCATCTCATAACAGCCACCTTGCTGCCCTTGCAGGCAATCCTGCGGCCACGGCTGCAGTGAAAACCTGCACTTAGCGGAAATCCAGTCCCATCTTGATAACCGTGTCACAGGGTAGTACAGGGCGACCTGGACGTCGGCGGTTACGAGGGCGGTTTGGCCGTTAAGGAATGGTTGCTGGCGCATGAGGGTCACCGGCTGGGAAAACCAGGTCTTGGTGGAGGAAGTGGAGGATCTaccactactcggcaccgegecececaactcctgcaccgaecatagcttcaaacgctttcattgeggcccgaaagtgtcggccagccgaggcgtgtgcatacaagagggctggattttgcatgtgatataatattgggccccttctgctggcacttggcggttcttctttagcctctgttattacgctctactgtAAGCGAGGTAGGAAAAAATTGCTGTATATCTTTAAACAGCCTTTTATGAGACCCGTGCAAACGACTCAAGAGGAAGACGGGTGTAGCTGTAGATTTCTGAAGAGGAAGAGGGGGGGTGCGAAGTGCggggtgaagttcagcagaagcgcgacgeccctgctaccagcagggccagaatcagctgtacaacgagctgaacctgggcagaagggaaagagtacgaectctggataagcggagagggcgggaccctgagatgggcggaagectcggcggaagaacccccaggaaagcctgtataacgaactgcAgaagacaagatggcgcgagcctacagcagatcgccatgaagggcgagcggaggcggggcaagggccacagcggcctgtatcagggcctgtccaccgcccaaggatacctacgacgcctgcacatgcaggcctgcccccaaggCTCGAGGGCGGGCGGAGAGGGCAGAGGAAGTCTTCTAACATGCGGTTGACGTGGAGGAGAATCCCGGCCCTCGCcatgagcgagctgattaaggagaacatgcacatgaagctgtacatggagggcaccctggacaaccatcacttcaagtgcacatecggaggcggaaggcaagccctacgagggcaccacagacatgaaatcaaggtggtegagggcggeccctctccccttgccttcgacatectggctactagcttctctacggcagcaagacctcacaaccacaccagggcatecccgacttcttaageagtccttccctgagggcttcaatgggagagagtcaccacatacgaagacggggcgctgctgaccgctaccaggacaccagcctccaggacggctgctcctatctacaacgtcaagatcagaggggtgaactcacatccaacggcctgtgatgcagaagaaaactcggctgggaggccttaccgagacgctgtaccccgctgacggcgccctggaaggcagaaaacgacatggcctgaagctcgtggcgaggccatctgategcaaacatcaagaccacatagatccagaaaaccgtaagaacctcaagatgctggcgtctactatgtggactacagactggaaagaatcaaggaggccaacaagaaacatacgtgagcagcagaggtggcagtgccagatactgcgacctcctagcaaacctggggcacaagcttaattaaGATCCTTGACTTGCGGCCGCAACTCCCAC</p> <p><b>Legend:</b></p> <p>5' region of pHR-PGK acceptor vector</p> <p>Leader sequence and Kozak sequence</p> <p>SNAPtag</p> <p>CD8<math>\alpha</math>-hinge, TM</p> <p>4-1BBcyto</p> <p>CD3<math>\zeta</math>cyto</p> <p>T2A</p> <p>TagBFP</p> <p>3' region of pHR-PGK acceptor vector</p> |
|----------------------------------------------------------------------------------------------------------------------------------------------------------------------------------------------------------------------------------------------------------------------------------------------------------------------------------------------------------------------------------------------------------------------------------------------------------------------------------------------------------------------------------------------------------------------------------------------------------------------------------------------------------------------------------------------------------------------------------------------------------------------------------------------------------------------------------------------------------------------------------------------------------------------------------------------------------------------------------------------------------------------------------------------------------------------------------------------------------------------------------------------------------------------------------------------------------------------------------------------------------------------------------------------------------------------------------------------------------------------------------------------------------------------------------------------------------------------------------------------------------------------------------------------------------------------------------------------------------------------------------------------------------------------------------------------------------------------------------------------------------------------------------------------------------------------------------------------------------------------------------------------------------------------------------------------------------------------------------------------------------------------------------------------------------------------------------------------------------------------------------------------------------------------------------------------------------------------------------------------------------------------------------------------------------------------------------------------------------------------------------------------------------------------------------------------------------------------------------------------------------------------------------------------------------------------------------|

**pHR-PGK-SNAP-synNotch-Gal4-VP64** (insert for pHR-PGK-[]-synNotch-Gal4-VP64 backbone)

**gagcaaaaacttatctctgaagaggacctc**ATGGACAAAGATTGCGAGATGAAGAGAACCACCCTGGATAGCCCTCTCGGCAAGCTCGAACTTTCTGGTTGTGAACAGGGTTTGCACAGGATCATCTTCTGGGAAAGGGAACCTCAGCCGCAGATGCGGTTGAAGTGCCAGCTCCGGCTGCAGTGCTTGGTGGACCCGAGCCTCTTATGCAAGCAACGGCATGGCTTAATGCTTATTTTCACCAGCCTGAGGCCATTGAAGAGTTTCCAGTTCCTGCATTGCATCACCCCGTTTTTCAGCAGGAATCCTTCACTAGACAAGTGC TTTGGAAGCTCTTGAAAGTGGTTAAATTTGGGGAAGTCATCTCATAACAGCCACCTTGCTGCCCTTGCAAGCAATCCTGCGGCCACGGCTGCAGTGAAAACCTGCACTTAGCGGAAATCCAGTCCCATCTTGATACCGTGTACAGGGTAGTACAGGGCGACCTGGACGTCGGCGGTTACGAGGGCGGTTTGGCCGTTAAGGAATGGTTGCTGGCGCATGAGGGTCACCGGCTGGGAAAACCAGGTCTTGGTGGAGGAA GTGGAGGATCTatcctggactacagcttcacaggtggeget

**Legend:**

5' region of pHR\_PGK\_antiCD19\_synNotch\_Gal4VP64 acceptor vector

SNAPtag

3' region of pHR\_PGK\_antiCD19\_synNotch\_Gal4VP64 acceptor vector

**pHR-PGK-mSA2x2-synNotch-Gal4-VP64** (insert for pHR\_PGK\_[]\_synNotch\_Gal4VP64 vector backbone)

**gagcaaaaacttatctctgaagaggacctc**GGCGCGGAGGCTGGAATCACTGGCACTTGGTATAATCAGCATGGCTCTACCTTACTGTAACAGCAGGGGCTGATGGCAACCTTACCAGCAATACGAGAATCGGGCGCAGGGTACGGGATGTCAAATTTCTCCCTATACACTGACCGGACGGTATAACGGTACCAAACCTCGAATGGAGGGTAGAATGGAACAACCTCTACAGAAAACCTGCCATAGCAGAACCGAATGGAGAGGCCAGTATCAAGGAGGTGCAGAAGCCCGAATTAACACCCAATGGAACCTGACTTACGAAGGCGGATCTGGACCAGCGACGGAACAGGGGCAGGATACTTTCACCAAAGTAAAGCCAAGTGCTGCGTCCGGTAGTGAGGCCGCTGCTAAAGAAGCAGCGGCCAAGGAAGCAGCTGCTAAGGGTGCAGAGGCTGGTATAACGGGGACTTGGTACAAACAGCACGGCTCCACCTTACTGTGACTGCTGGGGCAGATGGGAACTTGACAGGACAATATGAGAACCAGCACAAAGGGACGGGCTGCCAAAATAGTCCATATACACTCACGGGGCGATACAATGGCACTAAGCTGGAATGGAGGGTTGAGTGGAACAATTCAACGGAAAACCTGTCATTCCCGCACTGAATGGCGGGGGCAGTACCA GGGGGGGGCGGAGGCGAGAATCAACACACAATGGAACCTGACATACGAGGGGGGAAGTGGGCCTGCCACCGAACAAGGACAGGACACTTTTACTAAAGTGAAGCCCTCAGCTGCGTCAGGGAGTatcctggactacagcttcacaggtggeget

**Legend:**

5' region of pHR\_PGK\_antiCD19\_synNotch\_Gal4VP64 acceptor vector

mSA2x2

3' region of pHR\_PGK\_antiCD19\_synNotch\_Gal4VP64 acceptor vector

**pHR-pGal-IL7-PGK-mCherry** (insert for pHR\_Gal4UAS\_[]\_PGK\_mCherry vector backbone)

CCGATCCAGCCTCTCGACATTCGTTGGATC atgttccacgtaagtttcagatataatctttggacttcc  
gcegeteatattggtattgttgcagtggecatctagtactgtgacatagaaggaaaggatggtaaacagtatgaaagectact  
atggatccattgaccagcttctcgatagatgaaagagattggtagtaattgectcaataacagattcaatttctttaaacgaca  
catttgtgatgcaataaagagggaaatgttctgtttcegecegcgaggaagcttaggcagttccttaaaatgaaactcaactggg  
gatttegacctccatctgctgaaggtgagtgaaaggtactactattctctgaattgcacgggacaggtaaaggggcgaaaacct  
geggecttgggtgaggcacaaccaacaaaagcctcgaagaaaacaagtcctcaagaacagaagaagctcaacgatctg  
tgettttgaaaagactcttgcaggagatcaaaacttgttgaataagattttgatgggactaaggagcatTAAGATCC  
TTGACTTGCGGCCGCAACTCCC

SNAP-41BBζ-T2A-LNGFR (entire coding region inserted into MSGV1 vector, AgeI and NotI sites)

ACCGGTGGTACCTCACCTTACCGAGTCGGCGACACAGTGTGGGTCCGCCGA  
CACCAGACTAAGAACCTAGAACCTCGCTGGAAAGGACCTTACACAGTCCTGC  
TGACCACCCCCACCGCCCTCAAAGTAGACGGCATCGCAGCTTGGATAACACGC  
CGCCCACGTGAAGGCTGCCGACCCACGCGTCAAGTGGAGCAAGGCAGGTG  
GACAGTGGATC atggagacagacactcctgctatgggtgctgctgctgctgggtccaggtccacaggtATGG  
ACAAAGATTGCGAGATGAAGAGAACCACCTGGATAGCCCTCTCGGCAAGCT  
CGAACTTTCTGGTTGTGAACAGGGTTTGCACAGGATCATCTTCCCTGGGAAAG  
GGAACCTCAGCCGAGATGCGGTTGAAGTGCCAGCTCCGGCTGCAGTGCCTTG  
GTGGACCCGAGCCTCTTATGCAAGCAACGGCATGGCTTAATGCTTATTTTCA  
CCAGCCTGAGGCCATTGAAGAGTTTCCAGTTCCTGCATTGCATCACCCCGTT  
TTTCAGCAGGAATCCTTCACTAGACAAGTGCTTTGGAAGCTCTTGAAAGTGG  
TTAAATTTGGGGAAGTCATCTCATAACAGCCACCTTGCTGCCCTTGCAGGCAA  
TCCTGCGGCCACGGCTGCAGTGAAACTGCACTTAGCGGAAATCCAGTCCCC  
ATCTTGATACCGTGTCACAGGGTAGTACAGGGCGACCTGGACGTCCGGCGGTI  
ACGAGGGCGGTTTGGCCGTTAAGGAATGGTTGCTGGCGCATGAGGGTCACC  
GGCTGGGAAAACCAGGTCTTGGTGGAGGAAGTGGAGGATCT accactaetceggcacc  
gegcececaactcctgcaccgacgatagcttcaaacgcctttcattgceggcegaagcatgtcggccagcgcggaggcg  
ctgtgcatacaagagggtggattttgcatgtgatataatgtgggececttctgctggcacttgeggcgttcttcttagcct  
cgttattacgctcactgtAAGCGAGGTAGGAAAAAATTGCTGTATATCTTTAAACAGCC  
TTTTATGAGACCCGTGCAAACGACTCAAGAGGAAGACGGGTGTAGCTGTAGA  
TTTCTGAAGAGGAAGAGGGGGGGTCCGAAC TGcgggtgaagttcagcagaagegcgcagc  
cctgcctaccagagggccagaatcagetgtacaacgagetgaacctgggcagaagggaagagtacgacgtcctggataag  
cggagaggcggggaacctgagatggggeggaagcctcggcggaagaaceccaggaaggcctgtataacgaactgcAga  
agacaagatggcggaggcctacagcagatcgccatgaaggcgagcggaggcgggcaaggggccaagcggcctgtatc  
agggcctgtccaccgccaccaaggatacctacgacgcctgcacatgcaggecctgcececaaggCTCGAGGGCGG  
CGGAGAGGGCAGAGGAAGTCTTCTAACATGCGGTGACGTGGAGGAGAATCC  
CGGCCCTCGC atgggtgcaggegetacaggtgegcgaatggatggccttagactgetccttcttctgttgetcggggtt  
ccttgggtggcgcaaggaagcatgcctacagggctgtacaccattcggcgcaatgttgc aaagecgtgaacctgggagag  
ggtgttgetcaaccttgggggccaaccagaccgtttgtgagccatgctggatagcgttaccttcagcagcgtggtgtcgc  
cegagccttgaacctgcactgaatgctgtaggattgcaatctatgtcgccectcgttgaggcagacgacgccttgcag  
gtgcgctaeggftactatcaggatgagacaaccggcagatgcaagcatgtcagtttgcgaggcggatcaggtctggtt  
cagetgtcaggataaacaataacgtatgtgaggaatgccagacggaacctactcctgatgaagccaaccaacgtcagcct  
gectgcctgcaccgttgcgaggacacagaaaggcagctgcgagagtgcactcgggtgggcccagcgcgaatgcgaagaaat  
ccttggacgtggatcaccaggtctactcccctgaaggagtgactcaactgcacctcaacceaggagcctgaagctcccc  
agagcaggacctcagcttcaacagtggcgggggtggtactacgggtatggggagttctcagcctgtggtcacaagggca  
ccacagataacctcattcgggttactgctcaatcttggcggcagttgtggtggtctggtggcgtatcgcggtttaaagatgga

atagctagtagAAGTCGGGGATCCTTGACTTGCGGCCGC

**Legend:**

5' region

Leader sequence

SNAPtag

CD8 $\alpha$ -hinge, TM

4-1BBcyto

CD3 $\zeta$ cyto

T2A

LNGFR

3' region

Anti-CD20-41BB $\zeta$ -T2A-LNGFR (entire coding region inserted into MSGV1 vector, AgeI and NotI sites)

ACCGGTGGTACCTCACCCTTACCGAGTCGGCGACACAGTGTGGGTCCGCCGA  
CACCAGACTAAGAACCTAGAACCTCGCTGGAAAGGACCTTACACAGTCCTGC  
TGACCACCCACCACCCCTCAAAGTAGACGGCATCGCAGCTTGGATACACGC  
CGCCACGTGAAGGCTGCCGACCCACGCGTCAAGTGGAGCAAGGCAGGTG  
GACAGTGGATCcatggagacagacacactctctatgggtgctgctgctctgggttcaggttcacaggtGGTG  
ACATTGTGCTGACCCAATCTCCAGCTATCCTGTCTGCATCTCCAGGGGAGAA  
GGTCACAATGACTTGCAGGGCCAGCTCAAGTGTAATTACATGGACTGGTAC  
CAGAAGAAGCCAGGATCCTCCCCAAACCCTGGATTTATGCCACATCCAACC  
TGGCTTCTGGAGTCCCTGCTCGCTTCAGTGGCAGTGGGTCTGGGACCTCTTA  
CTCTCTACAATCAGCAGAGTGGAGGCTGAAGATGCTGCCACTTATTACTGC  
CAGCAGTGGAGTTTTAATCCACCCACGTTCCGGAGGGGGGACCAAGCTGGAAA  
TAAAAGGCAGTACTAGCGGTGGTGGCTCCGGGGGCGGTTCCGGTGGGGGCG  
GCAGCAGCGAGGTGCAGCTGCAGCAGTCTGGGGCTGAGCTGGTGAAGCCTG  
GGCCTCAGTGAAGATGTCCTGCAAGGCTTCTGGCTACACATTTACCAGTTA  
CAATATGCACTGGGTAAAGCAGACACCTGGACAGGGCCTGGAATGGATTGGA  
GCTATTTATCCAGGAAATGGTGATACTTCTTACAATCAGAAGTTCAAAGGCA  
AGGCCACATTGACTGCAGACAAATCCTCCAGCACAGCCTACATGCAGCTCAG  
CAGCCTGACATCTGAGGACTCTGCGGACTTACTGTGCAAGATCTAATTATT  
ACGGTAGTAGCTACTGGTTCTTCGATGTCTGGGGCGCAGGGACCACGGTCAC  
CGTCTCCTCAaccactactcggcaccgcgcccccaactctgcaccgacgatagcttcacaaccgctttcattgcgg  
cccgaageatgtcgccagecgcggaggecgtgcatacaagaggctggatttgcattgatataatattgggcgccc  
cttgcggcacttgcgggcttcttctttagcctcgttattacgetcctactgtaagegaggtaggaaaaaattgctgtataletffa  
aacagecitttatgagacccgtgcaaacgactcaagaggaagacgggtgtagctgtagatttctgaagaggaagagggggg  
gtggaactgcgggtgaagttcagcagaagecgcgacgccctgctaccagcagggccagaatcagctgtacaacgagctg  
aacctgggcagaaggggaagagtagcagctcctggataageggagagggcgggaccctgagatggggcggcaagcctcggcg  
gaagaacccccaggaaggcctgtataacgaactgcAgaagacaagatggccgaggcctacagcgagatcggcatgaagg  
gcgagcggagggcgggcaagggccacgacggcctgtatcagggectgtccaccgccaccaaggatacctacgacgcctgc  
acatgagggcctgcccccaaggctcgagggcggtggagagggcgggggtctctcttgcactgtggggatgtagaagaaaac  
ccccggccccgaATGGGTGCAGGCGCTACAGGTGCGCAATGGATGGCCCTAGACT  
GCTCCTTCTTCTGTTGCTCGGGGTTTCTTGGGTGGCGCAAAGGAAGCATGC  
CCTACAGGGCTGTACACCATTCCGGCGAATGTTGCAAAGCGTGTAACCTGG  
GAGAGGGTGTGCTCAACCTTGTGGGGCCAACCAGACCGTTTGTGAGCCATG

CCTGGATAGCGTTACCTTCAGCGACGTGGTGTCCGCCACCGAGCCTTGTA  
AA  
CCCTGCACTGAATGCGTAGGATTGCAATCTATGTCCGCCCCCTGCGTTGAGG  
CAGACGACGCCGTTTGCAGGTGCGCCTACGGTACTATCAGGATGAGACAAC  
CGGCAGATGCGAAGCATGTTCGAGTTTGCAGGGCCGGATCAGGTCTGGTTTC  
AGCTGTCAGGATAAAACAAAATACCGTATGTGAGGAATGCCCAGACGGAACCT  
ACTCCGATGAAGCCAACCACGTTCGATCCGTGCCTGCCGTGCACCGTTTGC  
GAGGACACAGAAAGGCAGCTGCGAGAGTGCACCTCGGTGGGCCCAGCGCCGAATG  
CGAAGAAATCCCTGGACGCTGGATCACCAGGTCTACTCCCCCTGAAGGGAGT  
GACTCAACTGCACCTTCAACCCAGGAGCCTGAAGCTCCCCCAGAGCAGGACC  
TCATCGCTTCAACAGTGGCCGGGGTGGTCACTACGGTGATGGGGAGTTCTCA  
GCCTGTGGTCACACGAGGCACACAGATAACCTCATTCCGGTTTACTGCTCA  
ATCTTGGCGGCAGTTGTGGTTGGTCTGGTGGCGTATATCGCGTTTAAAAGAT  
GGAATAGCTAGTAGGCGGCCGC

Legend:

5' region

Leader sequence and Kozak sequence

Anti-CD20 scFv

CD8 $\alpha$ -hinge, TM

4-1BBcyto

CD3 $\zeta$ cyto

T2A

LNGFR

3' region

Anti-HER2-41BB $\zeta$  (entire coding region inserted into MSGV1 vector, AgeI and NotI sites)

GGTACCTCACCTTACCGAGTCGGCGACACAGTGTGGGTCCGCCGACACCAG  
ACTAAGAACCTAGAACCTCGCTGGAAAGGACCTTACACAGTCCTGCTGACCA  
CCCCACCGCCCTCAAAGTAGACGGCATCGCAGCTTGGATACACGCCGCCCA  
CGTGAAGGCTGCCGACCCACGCGTCAAGTGGAGCAAGGCAGGTGGAAGCT  
TCACCATGGAGACAGACACACTCCTGCTATGGGTGCTGCTGCTCTGGGTTC  
AGGTTCCACAGGTGATATACAAATGACCCAATCTCCCTCCTCATTGAGTGCT  
CAGTCGGGGATCGCGTAACAATCACTTGCAAAGCTAGTCAAGATGTATCTAT  
TGGTGTGGCATGGTACCAGCAGAAACCAGGGAAAGCGCCTAAACTCCTTATC  
TATAGCGCGAGCTATCGATATAAGGAGTGCCGTCCAGATTTAGCGGTTCCG  
GTTTCAGGAACAGACTTTACGCTGACCATATCTTCACTTCAACCGGAAGATT  
GCGACTTACTACTGCCAACAATATTATATCTACCCTTATACTTTCGGCCAAGG  
GACTAAAGTTGAAATAAAAGGGGGTGGCGGGTCTGGCGGTGGAGGATCTGG  
CGGCGGTGGTTCTGAAGTCCAATTGGTTGAAAGTGGTGGTGGGTTGGTCCAG  
CCTGGCGGATCCTTGCGGTTGTCTGTGCCGCTCAGGATTTACCTTCACAG  
ATTACACGATGGACTGGGTGCGACAGGCCCCAGGTAAGGGCCTTGAATGGG  
TAGCTGACGTAAACCCTAACAGCGGGGGCTCCATATACAATCAACGGTTCAA  
AGGACGGTTTACACTGTCTGTGACAGGAGTAAGAATACCCTCTATCTCCAG  
ATGAACTCTCTCCGAGCTGAGGACACGGCAGTATACTGTGCTCGAAACC  
TCGGACCCTCTTTCTATTTGACTACTGGGGTCAGGGCACGCTGGTACTGT  
GAGCAGTACCACTACTCCGGCACCGCGCCCCCACTCCTGCACCGACGATA  
GCTTCAACCGCTTTCATTGCGGCCCGAAGCATGTCCGCCAGCCGCCGGAG  
GCGCTGTGCATACAAGAGGGCTGGATTTTGCATGTGATATATATTTGGGC

GCCCCTTGCTGGCACTTGCGGCGTTCTTCTTCTTAGCCTCGTTATTACGCTCT  
ACTGTAAGCGAGGTAGGAAAAAATTGCTGTATATCTTTAAACAGCCTTTTATG  
AGACCCGTGCAAACGACTCAAGAGGAAGACGGGTGTAGCTGTAGATTTCTG  
AAGAGGAAGAGGGGGGGTGC GAACTGCGGGTGAAGTTCAGCAGAAGCGCCG  
ACGCCCTGCCTACCAGCAGGGCCAGAATCAGCTGTACAACGAGCTGAACCT  
GGGCAGAAGGGAAGAGTACGACGTCCTGGATAAGCGGAGAGGCCGGGACCC  
TGAGATGGGCGGCAAGCCTCGGCGGAAGAACCCCAAGGAAGGCCTGTATAA  
CGAACTGCAGAAAGACAAGATGGCCGAGGCCTACAGCGAGATCGGCATGAA  
GGGCGAGCGGAGGCGGGGCAAGGGCCACGACGGCCTGTATCAGGGCCTGTC  
CACCGCCACCAAGGATACCTACGACGCCCTGCACATGCAGGCCCTGCCCCA  
AGGCTCGAGTAATAAGCGGCCGC

**Legend:**

**5' region**

**Anti-HER2 CAR**

**3' region**



**Table S5 | Fitted parameter values.**

| <i>SNAP-CAR T cell parameters</i> |             |             |             |                |                      |
|-----------------------------------|-------------|-------------|-------------|----------------|----------------------|
| <i>Antibody</i>                   | <i>k_f1</i> | <i>k_f2</i> | <i>k_r2</i> | <i>[Tcell]</i> | <i>[Tumor Cells]</i> |
| <i>FMC63</i>                      | 3.91606E-05 | 0.000113643 | 0.002273569 | 0.269805904    | 0.77409019           |
| <i>Cetuximab</i>                  | 0.000028    | 0.0031      | 0.0058      | 0.166053904    | 2.435457259          |
| <i>Herceptin</i>                  | 2.35329E-05 | 5.2682E-05  | 4.6763E-05  | 0.023368542    | 3.662540407          |
| <i>Rituximab</i>                  | 5.52577E-06 | 5.55581E-05 | 0.001082705 | 0.204688756    | 6.649347881          |
| <i>synNotch T cell parameters</i> |             |             |             |                |                      |
| <i>Antibody</i>                   | <i>k_f1</i> | <i>k_f2</i> | <i>k_r2</i> | <i>[Tcell]</i> | <i>[Tumor Cells]</i> |
| <i>FMC63</i>                      | 1.97257E-05 | 0.000588937 | 0.000973278 | 0.350870732    | 2.074613689          |
| <i>Cetuximab</i>                  | 6.88057E-06 | 0.002739548 | 0.004410671 | 0.153193991    | 7.998250675          |
| <i>Herceptin</i>                  | 7.97625E-06 | 0.00016536  | 1.03176E-05 | 0.89801904     | 15.61597465          |
| <i>Rituximab</i>                  | 2.80993E-06 | 0.000111117 | 0.000665739 | 1.549807386    | 7.599804046          |
